# Supplementary material for: Genome-wide association analysis reveals the optimal genomic regions for pod size in bean
Source: Front Plant Sci. 2023 May 12;14:1138988. doi: 10.3389/fpls.2023.1138988 (PMC10213521; doi:10.3389/fpls.2023.1138988)
Supplement: Supplementary file 1 [file Table_1.xlsx]

## Sheet: S1
Table S1 ANOVA analysis for PL, PW, PT, and SPW
Source	Type III Sum of Squares	df	Mean Square	F	Sig.
PL
Env	251.346	1	251.346	277.325	1.05201e-37
Gen	4005.91	87	46.045	50.8042	8.33394e-90
Env * Gen	150.597	84	1.79282	1.97812	8.85191e-05
Error	155.888	172	0.906323
Corrected Total	4595.36	344
PW
Env	153.939	1	153.939	209.769	1.35552e-31
Gen	1974.98	87	22.7009	30.9339	1.34724e-72
Env * Gen	104.611	84	1.24537	1.69704	0.00188432
Error	126.222	172	0.733851
Corrected Total	2334.88	344
PT
Env	944.342	1	944.342	10.0782	0.00177797
Gen	8180.99	87	94.0344	1.00355	0.48428
Env * Gen	8021.33	84	95.492	1.01911	0.451425
Error	16116.6	172	93.7013
Corrected Total	33263.5	344
SPW
Env	200.375	1	200.375	73.9364	2.97778e-13
Gen	1167.41	87	13.4185	4.95128	6.61465e-13
Env * Gen	161.252	84	1.91967	0.708339	0.943246
Error	235.779	87	2.7101
Corrected Total	1832.9	259

## Sheet: S2
Table S2 Annotation information of 618 candidate genes
Trait	Marker	Pos	Gene	start	end	Annotated function
Pod Length	Pv_0026128	19213953	Phvul.001G098700	19131375	19132241	Calcium-dependent lipid-binding (CaLB domain) family protein
			Phvul.001G098801	19156892	19160566	uncharacterized protein
			Phvul.001G098900	19185314	19185652	uncharacterized protein
			Phvul.001G099000	19219165	19231655	DNA repair metallo-beta-lactamase family protein
			Phvul.001G099200	19292481	19293770	Family of uncharacterized protein function (DUF716)
			Phvul.001G099300	19307177	19309845	Syntaxin/t-SNARE family protein
	Pv_0285901	344060	Phvul.004G004000	246710	247150	Plant self-incompatibility protein S1 family
			Phvul.004G004100	247720	252327	Pseudouridine synthase family protein
			Phvul.004G004200	253599	253949	Plant self-incompatibility protein S1 family
			Phvul.004G004300	256195	256617	Plant self-incompatibility protein S1 family
			Phvul.004G004400	257234	257509	Plant self-incompatibility protein S1 family
			Phvul.004G004500	259755	260180	Plant self-incompatibility protein S1 family
			Phvul.004G004600	260991	262178	uncharacterized protein
			Phvul.004G004700	264422	266954	glucuronokinase G
			Phvul.004G004800	268996	272573	Protein kinase superfamily protein
			Phvul.004G004900	273518	277709	NAC (No Apical Meristem) domain transcriptional regulator superfamily protein
			Phvul.004G005000	278794	282840	RNA-binding CRS1 / YhbY (CRM) domain protein
			Phvul.004G005100	284962	287372	beta-1,4-N-acetylglucosaminyltransferase family protein
			Phvul.004G005200	291029	300493	golgin candidate 6
			Phvul.004G005300	300713	304465	Galactose mutarotase-like superfamily protein
			Phvul.004G005400	315927	317696	cytochrome P450, family 96, subfamily A, polypeptide 10
			Phvul.004G005500	335523	336047	ubiquitin protein ligase 6
			Phvul.004G005600	345784	350309	NB-ARC domain-containing disease resistance protein
			Phvul.004G005700	368531	370087	cytochrome P450, family 96, subfamily A, polypeptide 10
			Phvul.004G005800	372078	374079	cytochrome P450, family 96, subfamily A, polypeptide 10
			Phvul.004G005900	380970	382499	cytochrome P450, family 96, subfamily A, polypeptide 10
			Phvul.004G006000	386618	394940	cytochrome P450, family 96, subfamily A, polypeptide 10
			Phvul.004G006050	394161	395837	cytochrome P450, family 96, subfamily A, polypeptide 10
			Phvul.004G006100	401756	403445	cytochrome P450, family 96, subfamily A, polypeptide 10
			Phvul.004G006200	422851	425633	methyl-CPG-binding domain 7
			Phvul.004G006300	431954	433623	cytochrome P450, family 96, subfamily A, polypeptide 1
	Pv_0445220	25626390	Phvul.005G090400	25542930	25543915	histone H2A 2
			Phvul.005G090500	25564343	25570237	formin homology5
			Phvul.005G090600	25573096	25574682	HSP20-like chaperones superfamily protein
			Phvul.005G090700	25578736	25585260	kinesin 3
			Phvul.005G090800	25585389	25587168	PsbQ-like 1
			Phvul.005G090900	25591533	25592864	C-terminal cysteine residue is changed to a serine 1
			Phvul.005G091000	25632442	25634894	basic helix-loop-helix (bHLH) DNA-binding superfamily protein
			Phvul.005G091100	25635335	25636351	Domain of uncharacterized protein function (DUF1995)
			Phvul.005G091200	25636647	25640316	galacturonosyltransferase 12
	Pv_0562916	13389784	Phvul.007G107700	13395748	13400745	Protein of uncharacterized protein function (DUF3741)
			Phvul.007G107800	13403511	13409056	casein kinase I
			Phvul.007G107900	13412174	13419422	AGC (cAMP-dependent, cGMP-dependent and protein kinase C) kinase family protein
			Phvul.007G108000	13444819	13451925	S-adenosyl-L-methionine-dependent methyltransferases superfamily protein
	Pv_1016502	1129181	Phvul.011G013600	1026192	1030396	terpene synthase 03
			Phvul.011G013700	1046231	1051589	Zinc finger (CCCH-type) family protein / RNA recognition motif (RRM)-containing protein
			Phvul.011G013800	1062927	1068070	Zinc finger (CCCH-type) family protein / RNA recognition motif (RRM)-containing protein
			Phvul.011G013900	1072636	1080219	autoinhibited Ca2+-ATPase 11
			Phvul.011G014000	1087210	1089801	cytokinin oxidase/dehydrogenase 6
			Phvul.011G014100	1099776	1103695	IQ-domain 11
			Phvul.011G014200	1106474	1109471	NB-ARC domain-containing disease resistance protein
			Phvul.011G014301	1129547	1132371	NB-ARC domain-containing disease resistance protein
			Phvul.011G014400	1142010	1144947	NB-ARC domain-containing disease resistance protein
			Phvul.011G014450	1148574	1149437	Disease resistance protein (CC-NBS-LRR class) family
			Phvul.011G014500	1149480	1151453	NB-ARC domain-containing disease resistance protein
			Phvul.011G014600	1154757	1160262	ubiquitin-specific protease 24
			Phvul.011G014700	1162787	1164046	Transducin/WD40 repeat-like superfamily protein
			Phvul.011G014800	1170720	1178217	purple acid phosphatase 24
			Phvul.011G014900	1180597	1185622	purple acid phosphatase 27
			Phvul.011G015000	1192507	1193757	scarecrow-like 3
			Phvul.011G015100	1198222	1201346	Pectin lyase-like superfamily protein
			Phvul.011G015200	1202132	1204327	tonoplast intrinsic protein 5;1
			Phvul.011G015300	1205296	1211056	P-loop containing nucleoside triphosphate hydrolases superfamily protein
			Phvul.011G015400	1211914	1212129	uncharacterized protein
			Phvul.011G015500	1214539	1214742	uncharacterized protein
			Phvul.011G015600	1216341	1221252	PLAC8 family protein
	Pv_1129860	47823838	Phvul.011G169400	47717325	47727364	Argonaute family protein
			Phvul.011G169300	47733316	47750986	Leucine-rich repeat transmembrane protein kinase
			Phvul.011G169200	47759608	47760948	Preprotein translocase Sec, Sec61-beta subunit protein
			Phvul.011G169222	47778102	47779576	RING/U-box superfamily protein
			Phvul.011G169244	47807998	47808282	Plant self-incompatibility protein S1 family
			Phvul.011G169266	47814427	47814858	Plant self-incompatibility protein S1 family
			Phvul.011G169288	47822677	47823072	Plant self-incompatibility protein S1 family
			Phvul.011G169310	47843467	47843898	Plant self-incompatibility protein S1 family
			Phvul.011G169332	47875373	47925977	Leucine-rich repeat transmembrane protein kinase
	Pv_1154801	51850889	Phvul.011G202000	51748695	51752673	beta glucosidase 17
			Phvul.011G202100	51754939	51759045	LRR and NB-ARC domains-containing disease resistance protein
			Phvul.011G202200	51765141	51769444	S-locus lectin protein kinase family protein
			Phvul.011G202300	51790068	51793730	NB-ARC domain-containing disease resistance protein
			Phvul.011G202366	51795804	51796622	NB-ARC domain-containing disease resistance protein
			Phvul.011G202432	51797959	51798981	LRR and NB-ARC domains-containing disease resistance protein
			Phvul.011G202500	51812114	51816296	beta glucosidase 17
			Phvul.011G202601	51841857	51842933	LRR and NB-ARC domains-containing disease resistance protein
			Phvul.011G202700	51842854	51844732	uncharacterized protein
			Phvul.011G202750	51843212	51844162	LRR and NB-ARC domains-containing disease resistance protein
			Phvul.011G202800	51844829	51845587	Disease resistance protein (TIR-NBS-LRR class) family
			Phvul.011G202900	51848083	51852564	LRR and NB-ARC domains-containing disease resistance protein
			Phvul.011G202966	51865432	51869290	NB-ARC domain-containing disease resistance protein
			Phvul.011G203032	51888739	51892610	LRR and NB-ARC domains-containing disease resistance protein
			Phvul.011G203100	51893582	51897126	LRR and NB-ARC domains-containing disease resistance protein
			Phvul.011G203200	51898838	51902923	Cyclophilin-like peptidyl-prolyl cis-trans isomerase family protein
			Phvul.011G203300	51903701	51906200	LYR family of Fe/S cluster biogenesis protein
			Phvul.011G203400	51907498	51917127	TGACG motif-binding factor 6
			Phvul.011G203450	51935530	51935883	sigma factor binding protein 1
Pod Thickness	Pv_0002282	3846586	Phvul.001G044800	3740734	3749689	G-protein-coupled receptor 1
			Phvul.001G044700	3764312	3765606	Protein of uncharacterized protein function (DUF1677)
			Phvul.001G044600	3793240	3798234	CTC-interacting domain 7
			Phvul.001G044500	3805613	3806302	Integrase-type DNA-binding superfamily protein
			Phvul.001G044400	3835436	3836623	hydroxyproline-rich glycoprotein family protein
			Phvul.001G044300	3847968	3848579	hydroxyproline-rich glycoprotein family protein
			Phvul.001G044200	3863348	3864531	hydroxyproline-rich glycoprotein family protein
			Phvul.001G044100	3893967	3900161	Protein of uncharacterized protein function (DUF1350)
			Phvul.001G044000	3905756	3909533	2-oxoglutarate (2OG) and Fe (II)-dependent oxygenase superfamily protein
			Phvul.001G043900	3910690	3914039	RING/U-box superfamily protein
			Phvul.001G043800	3921305	3924197	F-box family protein
			Phvul.001G043700	3924909	3931637	ubiquitin-specific protease 19
	Pv_0029912	21338661	Phvul.001G103100	21238058	21245077	ELMO/CED-12 family protein
			Phvul.001G103200	21360112	21363279	MATE efflux family protein
	Pv_0201428	48802744	Phvul.002G321700	48695141	48703037	DYNAMIN-like 1C
			Phvul.002G321800	48703894	48707587	flavin-binding, kelch repeat, f box 1
			Phvul.002G321900	48712193	48715696	prefoldin 6
			Phvul.002G322000	48719458	48721154	response regulator 14
			Phvul.002G322100	48723776	48728897	GLU-ADT subunit B
			Phvul.002G322200	48730070	48731298	Nucleotide excision repair, TFIIH, subunit TTDA
			Phvul.002G322300	48732567	48734137	response regulator 14
			Phvul.002G322400	48735636	48738584	glutathione peroxidase 3
			Phvul.002G322500	48740322	48746774	MAC/Perforin domain-containing protein
			Phvul.002G322600	48753676	48763330	Tetratricopeptide repeat (TPR)-like superfamily protein
			Phvul.002G322604	48760272	48760726	uncharacterized protein
			Phvul.002G322700	48765607	48768717	heat shock transcription factor A8
			Phvul.002G322800	48774556	48776307	vacuolar iron transporter 1
			Phvul.002G322900	48779470	48782786	vacuolar iron transporter 1
			Phvul.002G323000	48786657	48794177	disease resistance protein (TIR-NBS-LRR class), putative
			Phvul.002G323100	48796609	48803146	disease resistance protein (TIR-NBS-LRR class), putative
			Phvul.002G323200	48805820	48810839	disease resistance protein (TIR-NBS-LRR class)
			Phvul.002G323300	48814395	48821321	disease resistance protein (TIR-NBS-LRR class), putative
			Phvul.002G323400	48827778	48834046	disease resistance protein (TIR-NBS-LRR class), putative
			Phvul.002G323404	48844446	48845392	disease resistance protein (TIR-NBS-LRR class)
			Phvul.002G323700	48857307	48858670	vacuolar iron transporter 1
			Phvul.002G323704	48862995	48868411	disease resistance protein (TIR-NBS-LRR class), putative
			Phvul.002G323708	48873058	48884543	Disease resistance protein (TIR-NBS-LRR class) family
			Phvul.002G323712	48888578	48895789	disease resistance protein (TIR-NBS-LRR class), putative
			Phvul.002G323900	48895240	48898436	semialdehyde dehydrogenase family protein
			Phvul.002G324000	48899300	48902562	Small nuclear ribonucleoprotein family protein
	Pv_0212827	4133573	Phvul.003G038400	4121926	4126390	ACT domain repeat 4
			Phvul.003G038500	4139554	4140060	uncharacterized protein
			Phvul.003G038600	4151102	4157419	Chaperone DnaJ-domain superfamily protein
			Phvul.003G038700	4201273	4204095	Malectin/receptor-like protein kinase family protein
			Phvul.003G038800	4205380	4207902	Malectin/receptor-like protein kinase family protein
			Phvul.003G038900	4215776	4217396	Adenine nucleotide alpha hydrolases-like superfamily protein
			Phvul.003G039000	4225490	4229239	MIF4G domain-containing protein / MA3 domain-containing protein
			Phvul.003G039100	4232478	4234069	RING/U-box superfamily protein
	Pv_0684832	8785254	Phvul.008G088100	8689853	8700154	HEAT repeat ;WD domain, G-beta repeat protein protein
			Phvul.008G088200	8713474	8718714	ENTH/VHS/GAT family protein
			Phvul.008G088300	8750924	8753459	uncharacterized protein
			Phvul.008G088400	8757238	8771812	Protein of uncharacterized protein function (DUF567)
			Phvul.008G088500	8779254	8790831	Protein of uncharacterized protein function (DUF567)
			Phvul.008G088600	8780913	8782249	uncharacterized protein
			Phvul.008G088700	8798586	8799513	Protein of uncharacterized protein function (DUF567)
			Phvul.008G088800	8820561	8821621	Protein of uncharacterized protein function (DUF567)
			Phvul.008G088901	8849819	8850796	uncharacterized protein
			Phvul.008G089000	8856374	8858072	Protein of uncharacterized protein function (DUF567)
			Phvul.008G089100	8880987	8882871	Haloacid dehalogenase-like hydrolase (HAD) superfamily protein
	Pv_0685388	9098191	Phvul.008G089700	8999170	9013186	D-alanine--D-alanine ligase family
			Phvul.008G089800	9025634	9026215	uncharacterized protein
			Phvul.008G089900	9036707	9038158	NAD (P)-binding Rossmann-fold superfamily protein
			Phvul.008G090000	9050962	9057824	SCAR homolog 2
			Phvul.008G090100	9067532	9070356	uncharacterized protein
			Phvul.008G090200	9073532	9075631	NAD (P)-binding Rossmann-fold superfamily protein
			Phvul.008G090300	9078509	9081654	WRKY DNA-binding protein 33
			Phvul.008G090400	9082003	9084575	Uncharacterised protein family (UPF0497)
			Phvul.008G090500	9087261	9088769	UDP-glycosyltransferase 73B4
			Phvul.008G090600	9090439	9091920	UDP-glucosyl transferase 73B5
			Phvul.008G090700	9095228	9096654	UDP-glucosyl transferase 73B3
			Phvul.008G090766	9102897	9103397	UDP-glucosyl transferase 73B3
			Phvul.008G090832	9103448	9104308	UDP-glycosyltransferase 73B4
			Phvul.008G090900	9122451	9123848	UDP-glycosyltransferase 73B4
			Phvul.008G091100	9158342	9160695	methyltransferases
			Phvul.008G091200	9176359	9179612	Protein phosphatase 2C family protein
			Phvul.008G091300	9180621	9183769	NAD (P)-linked oxidoreductase superfamily protein
			Phvul.008G091400	9189860	9193062	SEC14 cytosolic factor family protein / phosphoglyceride transfer family protein
Pod Width	Pv_0008234	5648221	Phvul.001G051200	5557127	5562641	TPX2 (targeting protein for Xklp2) protein family
			Phvul.001G051300	5570533	5574219	EIN3-binding F box protein 1
			Phvul.001G051400	5594764	5598249	uncharacterized protein
			Phvul.001G051500	5610156	5610635	uncharacterized protein
			Phvul.001G051550	5619269	5620242	Integrase-type DNA-binding superfamily protein
			Phvul.001G051600	5631185	5632114	carboxyesterase 17
			Phvul.001G051700	5635349	5643370	DEAD/DEAH box RNA helicase family protein
			Phvul.001G051800	5644464	5651660	Tetratricopeptide repeat (TPR)-like superfamily protein
			Phvul.001G051900	5652167	5672379	AFG1-like ATPase family protein
			Phvul.001G052000	5680685	5683947	Mitochondrial substrate carrier family protein
			Phvul.001G052100	5695145	5699567	cytochrome P450, family 71, subfamily B, polypeptide 35
			Phvul.001G052200	5710684	5712150	Basic helix-loop-helix (bHLH) DNA-binding family protein
			Phvul.001G052300	5722039	5722931	tracheary element differentiation-related 7
			Phvul.001G052350	5746581	5747402	uncharacterized protein
	Pv_0127220	28035744	Phvul.002G134900	27943009	27950368	Mono-/di-acylglycerol lipase, N-terminal;Lipase, class 3
			Phvul.002G135000	27955876	27967618	Ankyrin repeat family protein
			Phvul.002G135100	27962205	27965945	NB-ARC domain-containing disease resistance protein
			Phvul.002G135200	27981238	27984576	Transcription elongation factor (TFIIS) family protein
			Phvul.002G135300	27993283	27997671	Protein of uncharacterized protein function (DUF760)
			Phvul.002G135400	27998630	28005955	Protein of uncharacterized protein function (DUF59)
			Phvul.002G135500	28021862	28025081	Mono-/di-acylglycerol lipase, N-terminal;Lipase, class 3
			Phvul.002G135650	28035444	28036847	NB-ARC domain-containing disease resistance protein
			Phvul.002G135800	28041176	28044239	Ankyrin repeat family protein
			Phvul.002G135900	28074321	28077179	Mono-/di-acylglycerol lipase, N-terminal;Lipase, class 3
			Phvul.002G136000	28087643	28099957	basic region/leucine zipper transcription factor 16
			Phvul.002G136100	28102316	28104431	DNAJ heat shock N-terminal domain-containing protein
			Phvul.002G136200	28119482	28122532	xyloglucan endotransglucosylase/hydrolase 30
			Phvul.002G136300	28133854	28138855	cellulose synthase-like D3
	Pv_0193604	43687336	Phvul.002G264600	43593152	43594342	stress enhanced protein 2
			Phvul.002G264700	43594353	43597605	uncharacterized protein
			Phvul.002G264800	43598744	43604012	shikimate kinase 1
			Phvul.002G264900	43621981	43624529	Tetratricopeptide repeat (TPR)-like superfamily protein
			Phvul.002G265000	43625322	43626924	Ribosomal protein L6 family protein
			Phvul.002G265100	43628599	43631903	uncharacterized protein
			Phvul.002G265200	43634673	43635370	uncharacterized protein
			Phvul.002G265300	43636426	43641044	Ras-related small GTP-binding family protein
			Phvul.002G265400	43645971	43647134	WRKY DNA-binding protein 51
			Phvul.002G265500	43656873	43659349	RAB GTPase homolog G3A
			Phvul.002G265600	43661571	43667557	chloroplast-localized ISCA-like protein
			Phvul.002G265700	43670675	43674325	copper ion binding;cobalt ion binding;zinc ion binding
			Phvul.002G265800	43674999	43678704	violaxanthin de-epoxidase-related
			Phvul.002G265804	43678000	43697377	Domain of uncharacterized protein function (DUF1726) ;Putative ATPase (DUF699)
			Phvul.002G266100	43700289	43702057	O-Glycosyl hydrolases family 17 protein
			Phvul.002G266200	43703129	43714125	S-adenosylmethionine carrier 1
			Phvul.002G266300	43715568	43752332	uncharacterized protein
			Phvul.002G266400	43771606	43773653	WRKY DNA-binding protein 13
			Phvul.002G266500	43782923	43785099	uncharacterized protein
			Phvul.002G266600	43786417	43792320	alkaline/neutral invertase
	Pv_0195014	46751740	Phvul.002G298100	46652289	46654436	uncharacterized protein
			Phvul.002G298200	46659036	46659557	uncharacterized protein
			Phvul.002G298300	46663225	46667319	RING/U-box superfamily protein
			Phvul.002G298304	46668092	46674198	Pentatricopeptide repeat (PPR) superfamily protein
			Phvul.002G298500	46681354	46685896	UDP-D-glucose/UDP-D-galactose 4-epimerase 5
			Phvul.002G298600	46688044	46688641	uncharacterized protein
			Phvul.002G298700	46692310	46699231	dynamin-like protein
			Phvul.002G298800	46700590	46702898	alpha/beta-Hydrolases superfamily protein
			Phvul.002G298900	46705643	46706544	Glycine-rich protein family
			Phvul.002G299000	46710276	46713402	phosphoinositide 4-kinase gamma 4
			Phvul.002G299004	46716341	46721280	RNA cyclase family protein
			Phvul.002G299008	46723113	46726139	phospholipase A 2A
			Phvul.002G299300	46727452	46730153	Calcium-binding EF-hand family protein
			Phvul.002G299400	46731778	46733742	calcineurin B-like protein 8
			Phvul.002G299500	46739967	46743488	centromere protein C
			Phvul.002G299600	46772459	46789976	uncharacterized protein
			Phvul.002G299700	46791870	46800422	FtsH extracellular protease family
			Phvul.002G299800	46805993	46810075	Nuclear transport factor 2 (NTF2) family protein
			Phvul.002G299900	46811047	46813316	uncharacterized protein
			Phvul.002G300000	46815420	46817578	transcriptional coactivator p15 (PC4) family protein (KELP)
			Phvul.002G300100	46818513	46819453	uncharacterized protein
			Phvul.002G300200	46824112	46825443	Glutaredoxin family protein
			Phvul.002G300300	46828513	46830997	DCD (Development and Cell Death) domain protein
			Phvul.002G300400	46834773	46838180	3-ketoacyl-acyl carrier protein synthase I
			Phvul.002G300500	46845362	46847358	RING/U-box superfamily protein
			Phvul.002G300600	46849868	46851622	Translation elongation factor EF1B/ribosomal protein S6 family protein
	Pv_0203965	48895245	Phvul.002G323100	48796609	48803146	disease resistance protein (TIR-NBS-LRR class), putative
			Phvul.002G323200	48805820	48810839	disease resistance protein (TIR-NBS-LRR class)
			Phvul.002G323300	48814395	48821321	disease resistance protein (TIR-NBS-LRR class), putative
			Phvul.002G323400	48827778	48834046	disease resistance protein (TIR-NBS-LRR class), putative
			Phvul.002G323404	48844446	48845392	disease resistance protein (TIR-NBS-LRR class)
			Phvul.002G323700	48857307	48858670	vacuolar iron transporter 1
			Phvul.002G323704	48862995	48868411	disease resistance protein (TIR-NBS-LRR class), putative
			Phvul.002G323708	48873058	48884543	Disease resistance protein (TIR-NBS-LRR class) family
			Phvul.002G323712	48888578	48895789	disease resistance protein (TIR-NBS-LRR class), putative
			Phvul.002G323900	48895240	48898436	semialdehyde dehydrogenase family protein
			Phvul.002G324000	48899300	48902562	Small nuclear ribonucleoprotein family protein
			Phvul.002G324100	48906246	48908726	PLATZ transcription factor family protein
			Phvul.002G324200	48913224	48918020	translocase of the outer mitochondrial membrane 40
			Phvul.002G324300	48919930	48920791	Ribosomal protein S5 domain 2-like superfamily protein
			Phvul.002G324400	48924528	48925847	epsin N-terminal homology (ENTH) domain-containing protein / clathrin assembly protein-related
			Phvul.002G324500	48926349	48950645	THO2
			Phvul.002G324600	48956019	48959744	transmembrane kinase 1
			Phvul.002G324700	48960810	48967076	26S proteasome regulatory complex, non-ATPase subcomplex, Rpn2/Psmd1 subunit
			Phvul.002G324800	48968554	48968990	uncharacterized protein
			Phvul.002G324900	48969401	48977518	CHASE domain containing histidine kinase protein
	Pv_0226301	12533721	Phvul.003G077400	12432059	12436990	tobamovirus multiplication 1
			Phvul.003G077500	12438671	12439225	uncharacterized protein
			Phvul.003G077600	12451743	12463593	binding;calmodulin binding
			Phvul.003G077700	12470193	12474603	RNA-binding (RRM/RBD/RNP motifs) family protein
			Phvul.003G077800	12475858	12478684	AT hook motif-containing protein
			Phvul.003G077900	12480684	12481505	uncharacterized protein
			Phvul.003G078000	12501287	12509716	uncharacterized protein
			Phvul.003G078200	12523058	12525086	uncharacterized protein
			Phvul.003G078300	12555312	12556182	Protein of uncharacterized protein function, DUF584
			Phvul.003G078400	12570426	12575047	calcium-dependent protein kinase 21
			Phvul.003G078500	12577365	12581751	uncharacterized protein
			Phvul.003G078600	12584313	12586676	Peroxidase superfamily protein
			Phvul.003G078700	12607315	12615366	Met-10+ like family protein / kelch repeat-containing protein
			Phvul.003G078800	12616294	12626379	starch synthase 3
			Phvul.003G078900	12628900	12632197	uncharacterized protein
	Pv_0272703	32138995	Phvul.003G128400	32072917	32073794	uncharacterized protein
			Phvul.003G128500	32095405	32096228	Plant invertase/pectin methylesterase inhibitor superfamily protein
			Phvul.003G128600	32105091	32118297	ARM repeat superfamily protein
			Phvul.003G128700	32122036	32128069	fatty acid biosynthesis 1
			Phvul.003G128800	32230627	32238415	auxin response factor 19
	Pv_0274424	33692550	Phvul.003G137600	33592134	33593688	xyloglucan endotransglycosylase 6
			Phvul.003G137700	33604318	33607565	Leucine-rich repeat transmembrane protein kinase
			Phvul.003G137800	33610873	33611130	uncharacterized protein
			Phvul.003G137900	33623836	33624190	low-molecular-weight cysteine-rich 5
			Phvul.003G138000	33629007	33629361	low-molecular-weight cysteine-rich 5
			Phvul.003G138100	33642229	33646870	TRICHOME BIREFRINGENCE-LIKE 5
			Phvul.003G139325	33683807	33685174	spermidine hydroxycinnamoyl transferase
			Phvul.003G140550	33691590	33692957	spermidine hydroxycinnamoyl transferase
			Phvul.003G141775	33699454	33702334	S-adenosyl-L-methionine-dependent methyltransferases superfamily protein
			Phvul.003G143000	33706415	33720553	pumilio 6
			Phvul.003G142900	33721633	33725494	metaxin-related
			Phvul.003G142800	33727393	33732164	Protein of uncharacterized protein function (DUF630 and DUF632)
			Phvul.003G142700	33789252	33798804	heavy metal atpase 2
	Pv_0298015	8968938	Phvul.004G063200	8908881	8919327	Zinc-finger domain of monoamine-oxidase A repressor R1 protein
			Phvul.004G063300	8965395	8966472	vacuolar proton ATPase A2
			Phvul.004G063400	9062525	9073412	Zinc-finger domain of monoamine-oxidase A repressor R1 protein
	Pv_0303974	13113489	Phvul.004G075500	13021706	13024749	NAC domain containing protein 41
			Phvul.004G075600	13045969	13050842	uncharacterized protein
			Phvul.004G075800	13060320	13061794	Plant protein of uncharacterized protein function (DUF247)
			Phvul.004G075900	13090090	13093485	NB-ARC domain-containing disease resistance protein
			Phvul.004G076100	13101330	13114661	NB-ARC domain-containing disease resistance protein
			Phvul.004G076001	13108566	13108961	NB-ARC domain-containing disease resistance protein
			Phvul.004G076200	13119224	13119583	cytochrome P450, family 72, subfamily A, polypeptide 15
			Phvul.004G076250	13147943	13148817	uncharacterized protein
			Phvul.004G076300	13184840	13190186	3-ketoacyl-CoA synthase 2
	Pv_0366735	46263029	Phvul.004G157000	46164350	46170995	P-loop containing nucleoside triphosphate hydrolases superfamily protein
			Phvul.004G157101	46176845	46178486	LOB domain-containing protein 41
			Phvul.004G157200	46180796	46182623	Complex I subunit NDUFS6
			Phvul.004G157300	46185294	46188957	B-box type zinc finger protein with CCT domain
			Phvul.004G157500	46195603	46202518	DNAse I-like superfamily protein
			Phvul.004G157600	46203527	46204474	Integrase-type DNA-binding superfamily protein
			Phvul.004G157700	46207831	46211083	syntaxin of plants 81
			Phvul.004G157800	46211596	46218724	NagB/RpiA/CoA transferase-like superfamily protein
			Phvul.004G157900	46224185	46224859	uncharacterized protein
			Phvul.004G158000	46239426	46240567	Concanavalin A-like lectin protein kinase family protein
			Phvul.004G158100	46258583	46259432	lectin receptor kinase a4.3
			Phvul.004G158200	46261905	46262865	Concanavalin A-like lectin protein kinase family protein
			Phvul.004G158300	46267391	46268336	Concanavalin A-like lectin protein kinase family protein
			Phvul.004G158400	46279090	46279960	uncharacterized protein
			Phvul.004G158500	46281001	46283394	uncharacterized protein
			Phvul.004G158600	46283715	46284556	Bifunctional inhibitor/lipid-transfer protein/seed storage 2S albumin superfamily protein
			Phvul.004G158700	46285512	46286429	Copper transport protein family
			Phvul.004G158800	46286743	46287522	Dehydrin family protein
			Phvul.004G158900	46294412	46300992	aluminum-activated malate transporter 9
			Phvul.004G159000	46302043	46311697	protein phosphatase 2A subunit A2
			Phvul.004G159100	46313107	46315850	LSD1-like 1
			Phvul.004G159200	46316692	46321543	Eukaryotic aspartyl protease family protein
			Phvul.004G159300	46348261	46352994	cytochrome P450, family 71, subfamily B, polypeptide 34
			Phvul.004G159400	46356939	46357262	Eukaryotic aspartyl protease family protein
			Phvul.004G159500	46359615	46361846	cytochrome P450, family 71, subfamily B, polypeptide 34
	Pv_0368967	47052667	Phvul.004G165400	46953978	46957925	Protein of uncharacterized protein function (DUF502)
			Phvul.004G165500	46960274	46964059	Protein of uncharacterized protein function (DUF502)
			Phvul.004G165600	46969154	46971575	uncharacterized protein
			Phvul.004G165700	46972263	46977029	RNA-binding protein-related
			Phvul.004G165800	46978465	46984204	Major facilitator superfamily protein
			Phvul.004G165900	46984897	46987608	CDK-activating kinase 1AT
			Phvul.004G166000	46991847	46995082	RHO-related protein from plants 9
			Phvul.004G166100	46999269	47001282	thioredoxin-dependent peroxidase 1
			Phvul.004G166200	47002404	47004128	Eukaryotic rpb5 RNA polymerase subunit family protein
			Phvul.004G166400	47047903	47050997	phytochrome-associated protein 2
			Phvul.004G166500	47055514	47056449	uncharacterized protein
			Phvul.004G166600	47058280	47059173	uncharacterized protein
			Phvul.004G166650	47063204	47065699	uncharacterized protein
			Phvul.004G166700	47067659	47069158	uncharacterized protein
			Phvul.004G166800	47077119	47078328	uncharacterized protein
			Phvul.004G166900	47083219	47085065	uncharacterized protein
			Phvul.004G167000	47088276	47089225	uncharacterized protein
			Phvul.004G167066	47093732	47094151	uncharacterized protein
			Phvul.004G167132	47094184	47094615	uncharacterized protein
			Phvul.004G167200	47098914	47099804	uncharacterized protein
			Phvul.004G167301	47104586	47106223	uncharacterized protein
			Phvul.004G167400	47116816	47118032	uncharacterized protein
			Phvul.004G167500	47119785	47120948	uncharacterized protein
			Phvul.004G167600	47136413	47137841	uncharacterized protein
			Phvul.004G167700	47147812	47148826	uncharacterized protein
	Pv_0421055	8368043	Phvul.005G059300	8299556	8305815	proteasome subunit PAB1
			Phvul.005G059400	8315782	8320930	uncharacterized protein
			Phvul.005G059500	8330132	8332580	Peroxidase superfamily protein
			Phvul.005G059600	8337987	8342674	Mitochondrial transcription termination factor family protein
			Phvul.005G059700	8346554	8349278	Peroxidase superfamily protein
			Phvul.005G059800	8379643	8380078	Scorpion toxin-like knottin superfamily protein
			Phvul.005G059900	8429050	8429488	Scorpion toxin-like knottin superfamily protein
			Phvul.005G060000	8434438	8437369	myb domain protein 63
	Pv_0447805	27146151	Phvul.005G087300	27050104	27050781	Wound-responsive family protein
			Phvul.005G087318	27064942	27065457	Wound-responsive family protein
			Phvul.005G087100	27066056	27069037	NB-ARC domain-containing disease resistance protein
	Pv_0519622	18274170	Phvul.006G069500	18178532	18180969	Protein phosphatase 2C family protein
			Phvul.006G069600	18190760	18192095	mitogen-activated protein kinase kinase kinase 14
			Phvul.006G069700	18192391	18205257	Clathrin, heavy chain
			Phvul.006G069800	18209904	18214005	Pre-mRNA splicing Prp18-interacting factor
			Phvul.006G069900	18217634	18230551	fructose-2,6-bisphosphatase
			Phvul.006G070000	18234374	18235307	TOXICOS EN LEVADURA 63
			Phvul.006G070100	18239879	18240356	RING/U-box superfamily protein
			Phvul.006G070200	18248775	18250370	ZIP metal ion transporter family
			Phvul.006G070300	18255046	18259995	Pentatricopeptide repeat (PPR) superfamily protein
			Phvul.006G070400	18262144	18264294	Nuclear transport factor 2 (NTF2) family protein
			Phvul.006G070500	18266044	18268005	Nuclear transport factor 2 (NTF2) family protein
			Phvul.006G070600	18270024	18285426	Acyl-CoA N-acyltransferases (NAT) superfamily protein
			Phvul.006G070800	18306525	18310744	uncharacterized protein
			Phvul.006G070900	18317699	18318407	uncharacterized protein
			Phvul.006G071000	18322802	18325604	Phosphatidate cytidylyltransferase family protein
			Phvul.006G071100	18337909	18339112	uncharacterized protein
			Phvul.006G071200	18348170	18349354	uncharacterized protein
			Phvul.006G071300	18368792	18370596	Basic-leucine zipper (bZIP) transcription factor family protein
	Pv_0545768	3001451	Phvul.007G035400	2895169	2904861	Tetratricopeptide repeat (TPR)-like superfamily protein
			Phvul.007G035500	2910802	2912034	uncharacterized protein
			Phvul.007G035600	2917294	2918096	uncharacterized protein
			Phvul.007G035700	2923875	2929837	transcription regulators
			Phvul.007G035800	2926455	2926983	uncharacterized protein
			Phvul.007G035900	2935824	2941633	quiescin-sulfhydryl oxidase 1
			Phvul.007G036000	2942315	2945798	RING/FYVE/PHD zinc finger superfamily protein
			Phvul.007G036100	2960615	2961929	uncharacterized protein
			Phvul.007G036200	2962903	2966983	uncharacterized protein
			Phvul.007G036300	2969877	2971300	uncharacterized protein
			Phvul.007G036400	2972341	2972661	uncharacterized protein
			Phvul.007G036500	2976416	2977924	ribose-5-phosphate isomerase 2
			Phvul.007G036900	3001104	3001680	ABC-2 type transporter family protein
			Phvul.007G036800	3002968	3013874	uncharacterized protein
			Phvul.007G037000	3014563	3018765	Phospholipid/glycerol acyltransferase family protein
			Phvul.007G037100	3021218	3025419	RNA polymerase II transcription elongation factor
			Phvul.007G037200	3026450	3027824	uncharacterized protein
			Phvul.007G037300	3039405	3040385	putative fasciclin-like arabinogalactan protein 20
			Phvul.007G037400	3043870	3048858	Core-2/I-branching beta-1,6-N-acetylglucosaminyltransferase family protein
			Phvul.007G037500	3049264	3051390	Tetratricopeptide repeat (TPR)-like superfamily protein
			Phvul.007G037600	3053681	3058235	SWAP (Suppressor-of-White-APricot)/surp domain-containing protein / ubiquitin family protein
			Phvul.007G037700	3061654	3065605	mediator 21
			Phvul.007G037800	3066120	3071826	CwfJ-like family protein
			Phvul.007G037900	3075597	3076792	Heavy metal transport/detoxification superfamily protein
			Phvul.007G038000	3087323	3089878	Heavy metal transport/detoxification superfamily protein
			Phvul.007G038100	3091073	3099569	transducin family protein / WD-40 repeat family protein
	Pv_0547992	5917854	Phvul.007G064900	5809382	5821650	phosphoglucomutase
			Phvul.007G065000	5823425	5831935	O-fucosyltransferase family protein
			Phvul.007G065100	5840277	5845985	K-box region and MADS-box transcription factor family protein
			Phvul.007G065200	5855391	5858886	pfkB-like carbohydrate kinase family protein
			Phvul.007G065300	5860606	5865173	uncharacterized protein
			Phvul.007G065400	5874045	5877703	uncharacterized protein
			Phvul.007G065550	5903549	5927301	AGAMOUS-like 42
			Phvul.007G065700	5931680	5933564	2-oxoglutarate (2OG) and Fe(II)-dependent oxygenase superfamily protein
			Phvul.007G065800	5934087	5935722	Peroxidase superfamily protein
			Phvul.007G065900	5939213	5940777	TCP family transcription factor
			Phvul.007G066000	5944934	5947452	Pentatricopeptide repeat (PPR-like) superfamily protein
			Phvul.007G066100	5951221	5953176	Pyridoxal phosphate (PLP)-dependent transferases superfamily protein
			Phvul.007G066200	5959992	5963252	Glucose-methanol-choline (GMC) oxidoreductase family protein
			Phvul.007G066300	5974913	5975454	peptidoglycan-binding LysM domain-containing protein
			Phvul.007G066400	5988578	6001380	valyl-tRNA synthetase / valine--tRNA ligase (VALRS)
			Phvul.007G066500	6004513	6005118	Integrase-type DNA-binding superfamily protein
	Pv_0721251	31136317	Phvul.008G144000	31056701	31058317	Uncharacterised protein family (UPF0497)
			Phvul.008G144100	31082994	31084949	expansin B2
	Pv_0802255	7474435	Phvul.009G032600	7380686	7381618	VQ motif-containing protein
			Phvul.009G032700	7402474	7407169	Seryl-tRNA synthetase
			Phvul.009G032800	7408001	7412943	O-fucosyltransferase family protein
			Phvul.009G032900	7435966	7436508	uncharacterized protein
			Phvul.009G033000	7439221	7442496	Mitochondrial ribosomal protein L27
			Phvul.009G033100	7444912	7454996	uncharacterized protein
			Phvul.009G033200	7484152	7501196	isoamylase 3
			Phvul.009G033300	7502481	7503465	uncharacterized protein
			Phvul.009G033400	7511279	7512211	uncharacterized protein
			Phvul.009G033500	7518273	7519361	Cupredoxin superfamily protein
			Phvul.009G033600	7529305	7531555	RNA-binding (RRM/RBD/RNP motifs) family protein
			Phvul.009G033700	7533183	7535378	uncharacterized protein
			Phvul.009G033800	7550689	7552212	basic helix-loop-helix (bHLH) DNA-binding superfamily protein
	Pv_1169490	53574929	Phvul.011G215600	53476380	53478525	organic cation/carnitine transporter 3
			Phvul.011G215700	53479550	53484372	uncharacterized protein
			Phvul.011G215800	53485896	53491328	eukaryotic translation initiation factor SUI1 family protein
			Phvul.011G215900	53495938	53507643	dynamin-like 3
			Phvul.011G216000	53508727	53513013	Galactose-binding protein
			Phvul.011G216100	53514062	53525438	molybdenum cofactor sulfurase (LOS5) (ABA3)
			Phvul.011G216200	53529665	53538630	Protein kinase family protein with ARM repeat domain
			Phvul.011G216300	53541788	53544017	Peroxidase superfamily protein
			Phvul.011G216400	53550459	53557543	Signal transduction histidine kinase, hybrid-type, ethylene sensor
			Phvul.011G216500	53560434	53563086	Tetratricopeptide repeat (TPR)-like superfamily protein
			Phvul.011G216600	53564324	53567423	uncharacterized protein
			Phvul.011G216700	53567722	53572869	uncharacterized protein
Single Pod Weight	Pv_0015964	12473517	Phvul.001G082700	12486755	12490014	histidine biosynthesis bifunctional protein (HISIE)
	Pv_0165916	36567260	Phvul.002G199800	36477078	36478878	FAD-binding Berberine family protein
			Phvul.002G200600	36494854	36496476	FAD-binding Berberine family protein
			Phvul.002G200700	36505324	36506940	FAD-binding Berberine family protein
			Phvul.002G200000	36531744	36533574	FAD-binding Berberine family protein
			Phvul.002G200066	36571319	36572935	FAD-binding Berberine family protein
			Phvul.002G200132	36574885	36576570	FAD-binding Berberine family protein
			Phvul.002G200200	36577852	36579480	FAD-binding Berberine family protein
			Phvul.002G200300	36590902	36592518	FAD-binding Berberine family protein
			Phvul.002G200400	36600210	36602013	FAD-binding Berberine family protein
			Phvul.002G200500	36609068	36609763	uncharacterized protein
			Phvul.002G199900	36649920	36650804	FAD-binding Berberine family protein
	Pv_0223474	11173316	Phvul.003G072000	11105030	11107536	BIG PETAL P
			Phvul.003G072200	11117010	11145109	aminophospholipid ATPase 3
			Phvul.003G072400	11174187	11177735	disease resistance protein (TIR-NBS-LRR class), putative
			Phvul.003G072500	11224363	11230626	transmembrane receptors;ATP binding
			Phvul.003G072600	11248623	11255675	protein phosphatase 2A-2
			Phvul.003G072700	11269441	11285525	FAD/NAD (P)-binding oxidoreductase family protein
	Pv_0237496	16882167	Phvul.003G086300	16877488	16879137	Heavy metal transport/detoxification superfamily protein
			Phvul.003G086200	16898113	16898820	uncharacterized protein
			Phvul.003G086100	16903323	16905821	pentatricopeptide (PPR) repeat-containing protein
			Phvul.003G086000	16908121	16911795	microtubule-associated proteins 70-1
			Phvul.003G085900	16915725	16916280	uncharacterized protein
			Phvul.003G085800	16916850	16918068	Outward rectifying potassium channel protein
			Phvul.003G085700	16927291	16927788	uncharacterized protein
			Phvul.003G085600	16947122	16948410	uncharacterized protein
			Phvul.003G085500	16948780	16949593	uncharacterized protein
			Phvul.003G085400	16950726	16952504	cytochrome P450, family 71, subfamily B, polypeptide 34
	Pv_0527678	26312586	Phvul.006G157100	26219980	26221770	RING/U-box superfamily protein
			Phvul.006G157200	26224165	26226207	RING/U-box superfamily protein
			Phvul.006G157300	26227354	26230675	FAR1-related sequence 7
			Phvul.006G157400	26232107	26234312	Bax inhibitor-1 family protein
			Phvul.006G157500	26236223	26237686	BSD domain-containing protein
			Phvul.006G157600	26238923	26246786	Mo25 family protein
			Phvul.006G157700	26249216	26255293	F-box/RNI-like superfamily protein
			Phvul.006G157800	26263616	26264925	Adenosylmethionine decarboxylase family protein
			Phvul.006G157900	26269824	26274048	Protein phosphatase 2C family protein
			Phvul.006G158000	26275884	26283969	SAC3/GANP/Nin1/mts3/eIF-3 p25 family
			Phvul.006G158100	26284500	26286026	methionine sulfoxide reductase B 2
			Phvul.006G158200	26288335	26288920	Cox19-like CHCH family protein
			Phvul.006G158300	26289602	26290833	methionine sulfoxide reductase B 2
			Phvul.006G158400	26291277	26292388	Cox19-like CHCH family protein
			Phvul.006G158500	26299500	26303930	RING/U-box superfamily protein
			Phvul.006G158600	26306027	26307218	uncharacterized protein
			Phvul.006G158700	26309656	26311746	DNAse I-like superfamily protein
			Phvul.006G158800	26314379	26314990	DUF679 domain membrane protein 2
			Phvul.006G158900	26318089	26320053	uncharacterized protein
			Phvul.006G159000	26322220	26325850	uncharacterized protein
			Phvul.006G159100	26327737	26331487	Protein kinase superfamily protein
			Phvul.006G159200	26332892	26337097	2-oxoglutarate (2OG) and Fe (II)-dependent oxygenase superfamily protein
			Phvul.006G159300	26336534	26342306	histidine-containing phosphotransmitter 1
			Phvul.006G159400	26342439	26349921	inosine-uridine preferring nucleoside hydrolase family protein
			Phvul.006G159500	26355544	26361954	transducin family protein / WD-40 repeat family protein
			Phvul.006G159600	26364222	26367945	Major facilitator superfamily protein
			Phvul.006G159700	26373187	26387876	squamosa promoter binding protein-like 7
			Phvul.006G159800	26382896	26383476	uncharacterized protein
			Phvul.006G159900	26408298	26412183	Deoxyxylulose-5-phosphate synthase
	Pv_0527777	26833487	Phvul.006G164300	26739466	26743148	potassium channel in Arabidopsis thaliana 1
			Phvul.006G164400	26743188	26747561	alpha-mannosidase 3
			Phvul.006G164500	26754227	26754930	uncharacterized protein
			Phvul.006G164600	26762417	26762818	uncharacterized protein
			Phvul.006G164700	26764666	26765383	Protein of uncharacterized protein function, DUF538
			Phvul.006G164800	26767815	26770778	Protein of uncharacterized protein function (DUF616)
			Phvul.006G164900	26772599	26774016	uncharacterized protein
			Phvul.006G165000	26788427	26790532	gibberellin 2-oxidase
			Phvul.006G165100	26814660	26816804	Glycosyl hydrolase superfamily protein
			Phvul.006G165200	26832328	26832666	uncharacterized protein
			Phvul.006G165300	26839287	26854035	cullin4
			Phvul.006G165400	26855528	26856120	uncharacterized protein
			Phvul.006G165500	26857322	26858539	Galactose oxidase/kelch repeat superfamily protein
			Phvul.006G165600	26865725	26868689	Transketolase family protein
			Phvul.006G165700	26872914	26877633	uncharacterized protein
			Phvul.006G165800	26882470	26884320	jasmonate-zim-domain protein 8
			Phvul.006G165901	26887663	26889272	receptor like protein 29
			Phvul.006G166000	26894868	26895629	uncharacterized protein
			Phvul.006G166100	26898963	26903342	DEGP protease 5
			Phvul.006G166200	26904562	26905785	Small nuclear ribonucleoprotein family protein
			Phvul.006G166300	26907147	26912347	uncharacterized protein
			Phvul.006G166400	26914027	26919922	Phosphatidylinositol N-acetylglucosaminyltransferase, GPI19/PIG-P subunit
			Phvul.006G166500	26926642	26929643	F-box family protein
	Pv_0686810	9704115	Phvul.008G094500	9626760	9628781	lectin receptor kinase a4.1
			Phvul.008G094700	9633430	9645452	tetratricopeptide repeat (TPR)-containing protein
			Phvul.008G094800	9681839	9684032	myb-like HTH transcriptional regulator family protein
			Phvul.008G094900	9699876	9704363	ammonium transporter 2
			Phvul.008G095000	9705680	9708991	BCL-2-associated athanogene 4
			Phvul.008G095100	9714158	9714658	APRATAXIN-like
			Phvul.008G095200	9726666	9729844	receptor like protein 33
			Phvul.008G095301	9745991	9749808	receptor like protein 7
			Phvul.008G095400	9762382	9765639	Thiamine pyrophosphate dependent pyruvate decarboxylase family protein
			Phvul.008G095600	9789093	9792492	DNAJ heat shock N-terminal domain-containing protein
	Pv_0692879	13885583	Phvul.008G115800	13794316	13808308	Regulator of chromosome condensation (RCC1) family protein
			Phvul.008G115900	13824002	13826946	NAD (P)-binding Rossmann-fold superfamily protein
			Phvul.008G116000	13872188	13874086	NAD (P)-binding Rossmann-fold superfamily protein
			Phvul.008G116100	13887624	13891737	NAD (P)-binding Rossmann-fold superfamily protein
			Phvul.008G116200	13903700	13915796	NAD (P)-binding Rossmann-fold superfamily protein
			Phvul.008G116300	13936505	13938168	NAD (P)-binding Rossmann-fold superfamily protein
			Phvul.008G116400	13963642	13964304	NAD (P)-binding Rossmann-fold superfamily protein
			Phvul.008G116500	13976426	13980291	NAD (P)-binding Rossmann-fold superfamily protein
	Pv_0791404	63047615	Phvul.008G292100	62939110	62948821	Calcium-binding EF hand family protein
			Phvul.008G292200	62950594	62954771	glutamate receptor 2
			Phvul.008G292300	62956092	62958543	homoserine kinase
			Phvul.008G292400	62959625	62964122	tonoplast monosaccharide transporter2
			Phvul.008G292500	62964860	62973752	Calcium-dependent protein kinase family protein
			Phvul.008G292600	62969443	62970086	photosystem II reaction center protein B
			Phvul.008G292700	62990395	62991552	uncharacterized protein
			Phvul.008G292800	62993954	63002603	Nucleotide-sugar transporter family protein
			Phvul.008G292900	63003795	63009992	chloride channel E
			Phvul.008G293000	63010739	63016221	FAR1-related sequence 5
			Phvul.008G293100	63017774	63033580	SEC7-like guanine nucleotide exchange family protein
			Phvul.008G293200	63035925	63041035	FAR1-related sequence 9
	Pv_0932953	12316708	Phvul.010G064300	12222615	12226016	inflorescence meristem receptor-like kinase 2
			Phvul.010G064400	12240718	12256353	uncharacterized protein
			Phvul.010G064500	12251599	12252642	alpha/beta-Hydrolases superfamily protein
			Phvul.010G064600	12253120	12255023	uncharacterized protein
			Phvul.010G064700	12257527	12260383	NB-ARC domain-containing disease resistance protein
			Phvul.010G064800	12320957	12326026	disease resistance protein (TIR-NBS-LRR class), putative
			Phvul.010G064900	12409800	12414655	Leucine-rich repeat protein kinase family protein
	Pv_0933835	12783478	Phvul.010G065200	12692039	12695387	20S proteasome alpha subunit C1
			Phvul.010G065300	12857180	12862674	TRICHOME BIREFRINGENCE-LIKE 34
	Pv_0939702	16283834	Phvul.010G073600	16315107	16328728	BCL-2-associated athanogene 4
	Pv_0940934	16955046	Phvul.010G074080	16975890	16980285	uncharacterized protein
			Phvul.010G074960	16978400	16979827	Pentatricopeptide repeat (PPR) superfamily protein
			Phvul.010G075840	16981010	16981960	microtubule-associated proteins 70-3
			Phvul.010G076720	16985265	16993748	Transcription factor jumonji (jmj) family protein / zinc finger (C5HC2 type) family protein
	Pv_0959635	27212413	Phvul.010G077900	27295270	27299951	Protein kinase superfamily protein
	Pv_0961930	28382540	Phvul.010G075500	28283209	28293553	myb domain protein 1
			Phvul.010G075400	28323708	28325462	glutathione S-transferase TAU 8
			Phvul.010G075300	28343519	28347915	Protein kinase protein with tetratricopeptide repeat domain
			Phvul.010G075200	28375469	28378046	Pectinacetylesterase family protein
			Phvul.010G075100	28400554	28405546	Arabidopsis Inositol phosphorylceramide synthase 2
			Phvul.010G075000	28429531	28430565	Stress induced protein
			Phvul.010G074900	28443494	28444381	AP2/B3-like transcriptional factor family protein
	Pv_0968910	32052969	Phvul.010G071400	31979707	31982067	uncharacterized protein
			Phvul.010G071500	31987114	31992290	uncharacterized protein
			Phvul.010G071600	32084775	32088147	Polynucleotidyl transferase, ribonuclease H-like superfamily protein
			Phvul.010G071700	32116935	32119580	uncharacterized protein
			Phvul.010G071766	32132142	32138589	Nucleotidyltransferase family protein
			Phvul.010G071832	32139093	32143458	Nucleotidyltransferase family protein
	Pv_0974939	34687854	Phvul.010G091400	34608368	34610916	uncharacterized protein
			Phvul.010G091500	34613095	34624939	Disease resistance protein (CC-NBS-LRR class) family
			Phvul.010G091600	34652897	34653922	Plant protein of uncharacterized protein function (DUF828)
			Phvul.010G091650	34713367	34715677	NB-ARC domain-containing disease resistance protein
			Phvul.010G091701	34716112	34720651	NB-ARC domain-containing disease resistance protein
			Phvul.010G091751	34729085	34729855	uncharacterized protein
			Phvul.010G091800	34744680	34754984	NB-ARC domain-containing disease resistance protein
	Pv_0977521	35814018	Phvul.010G094100	35714782	35715264	uncharacterized protein
			Phvul.010G094200	35730040	35736152	DEA(D/H)-box RNA helicase family protein
			Phvul.010G094300	35743329	35744305	uncharacterized protein
			Phvul.010G094400	35745450	35753131	CCCH-type zinc finger family protein
			Phvul.010G094450	35751586	35755468	quinolinate synthase
			Phvul.010G094500	35764080	35764688	SAUR-like auxin-responsive protein family
			Phvul.010G094600	35772420	35782626	P-loop containing nucleoside triphosphate hydrolases superfamily protein
			Phvul.010G094700	35791606	35799706	NAD-dependent malic enzyme 2
			Phvul.010G094800	35809094	35812347	NAD (P)-binding Rossmann-fold superfamily protein
			Phvul.010G094900	35822228	35826947	NAD (P)-binding Rossmann-fold superfamily protein
			Phvul.010G095000	35839790	35842610	NAD (P)-binding Rossmann-fold superfamily protein
			Phvul.010G095100	35849633	35851405	Cellulase (glycosyl hydrolase family 5) protein
			Phvul.010G095200	35852796	35853248	uncharacterized protein
			Phvul.010G095300	35865181	35867563	NAD (P)-binding Rossmann-fold superfamily protein
			Phvul.010G095400	35891092	35895356	NAD (P)-binding Rossmann-fold superfamily protein
